# Supplementary material for: Current clinical practices of cytoreductive surgery (CRS) and hyperthermic intraperitoneal chemotherapy (HIPEC)
Source: publisher site journal article supplement (doi:10.1515/iss-2023-0055), 2024-03-01
Supplement: Supplementary file [file j_iss-2023-0055_suppl_001.pdf]

## Reviewer Assessment

# P. Piso et al.: Current clinical Practices of Cytoreductive Surgery (CRS) and Hyperthermic Intraperitoneal Chemotherapy (HIPEC)

## Reviewers' Comments to Original Submission

### Reviewer 1: anonymous

Date received: 13-Dec-2023

Reviewer recommendation:

**Accept in present form**

Reviewer overall scoring:

**Excellent**

#### Comments to author:

Excellent review that covers all aspects of this treatment option for peritoneal carcinomatosis. During the production process a check of the use of the English language is highly recommended.

Also please check figures 1-4 - where should they be placed in the manuscript exactly?

### Reviewer 2: Seitz, Guido

Date received: 19-Dec-2023

Reviewer recommendation:

**Accept in present form**

Reviewer overall scoring:

**Excellent**

#### Comments to author:

Well written. Pages for citation 1 are missing. Please add
